# Supplementary material for: Self-assembled phosphate-polyamine networks as biocompatible supramolecular platforms to modulate cell adhesion
Source: Royal Society of Chemistry journal article supplement (doi:10.1039/c8bm00265g), 2018-01-01
Supplement: c8bm00265g1.pdf [file c8bm00265g1.pdf]

## Electronic Supporting information

### Self-assembled phosphate-polyamine networks as biocompatible supramolecular platforms to modulate cell adhesion

Nicolás E. Muzzio, Miguel A. Pasquale, Waldemar A. Marmisollé, Catalina von Bilderling, M. Lorena Cortez, Lía I. Pietrasanta, Omar Azzaroni

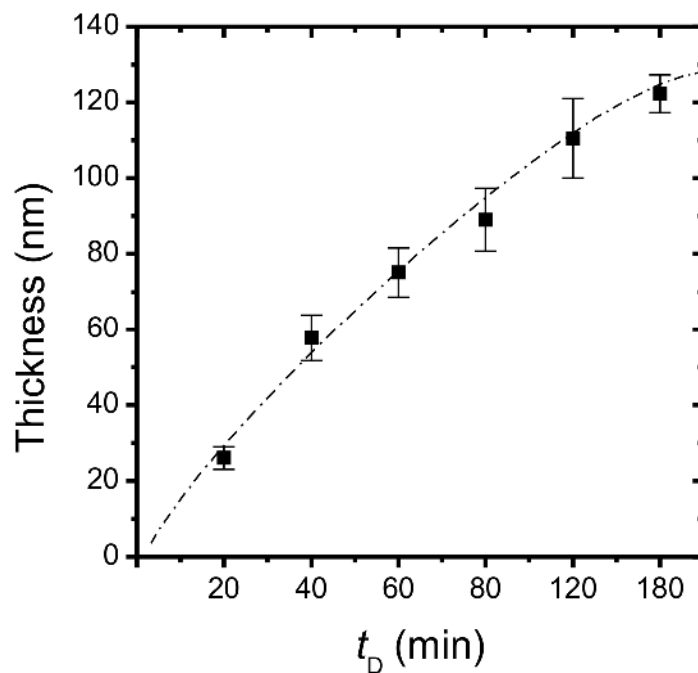

**Figure S1.** Pi/PAH coating thickness versus deposition time ( $t_D$ ). The coating thickness was measured by atomic force microscopy (AFM). For this purpose, the depth of a thin linear furrow scraped in the samples was measured.

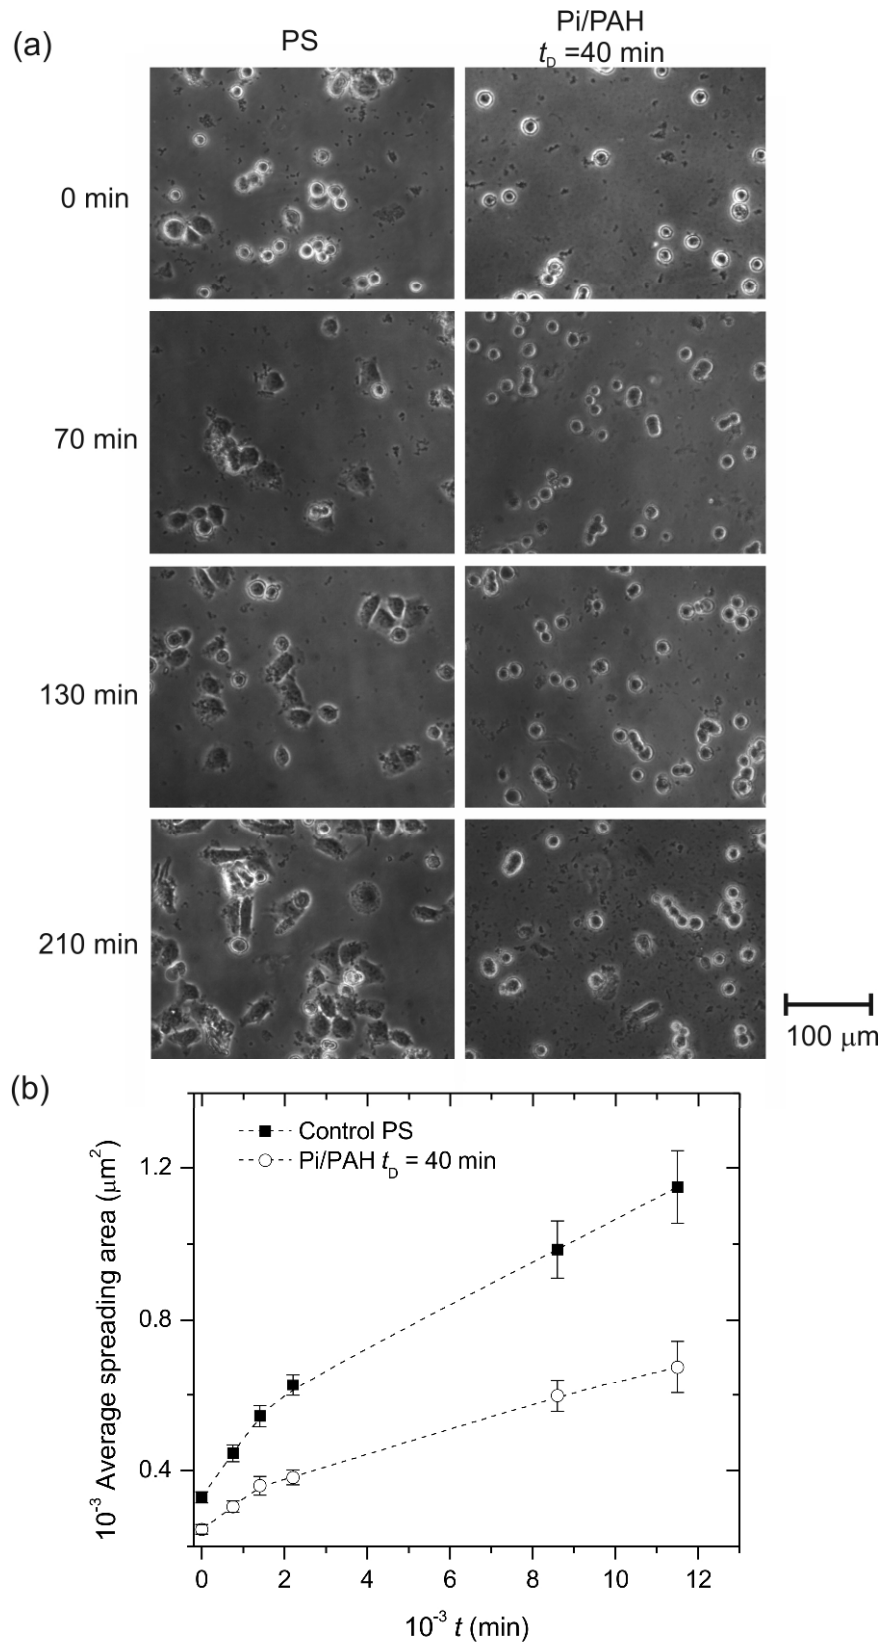

**Figure S2a.** Evolution of HeLa cell spreading area at short culture times. The starting time was 2 h after seeding. (a) Typical phase contrast images taken at the times indicated in the figure. (b) Average cell spreading area versus culture time.

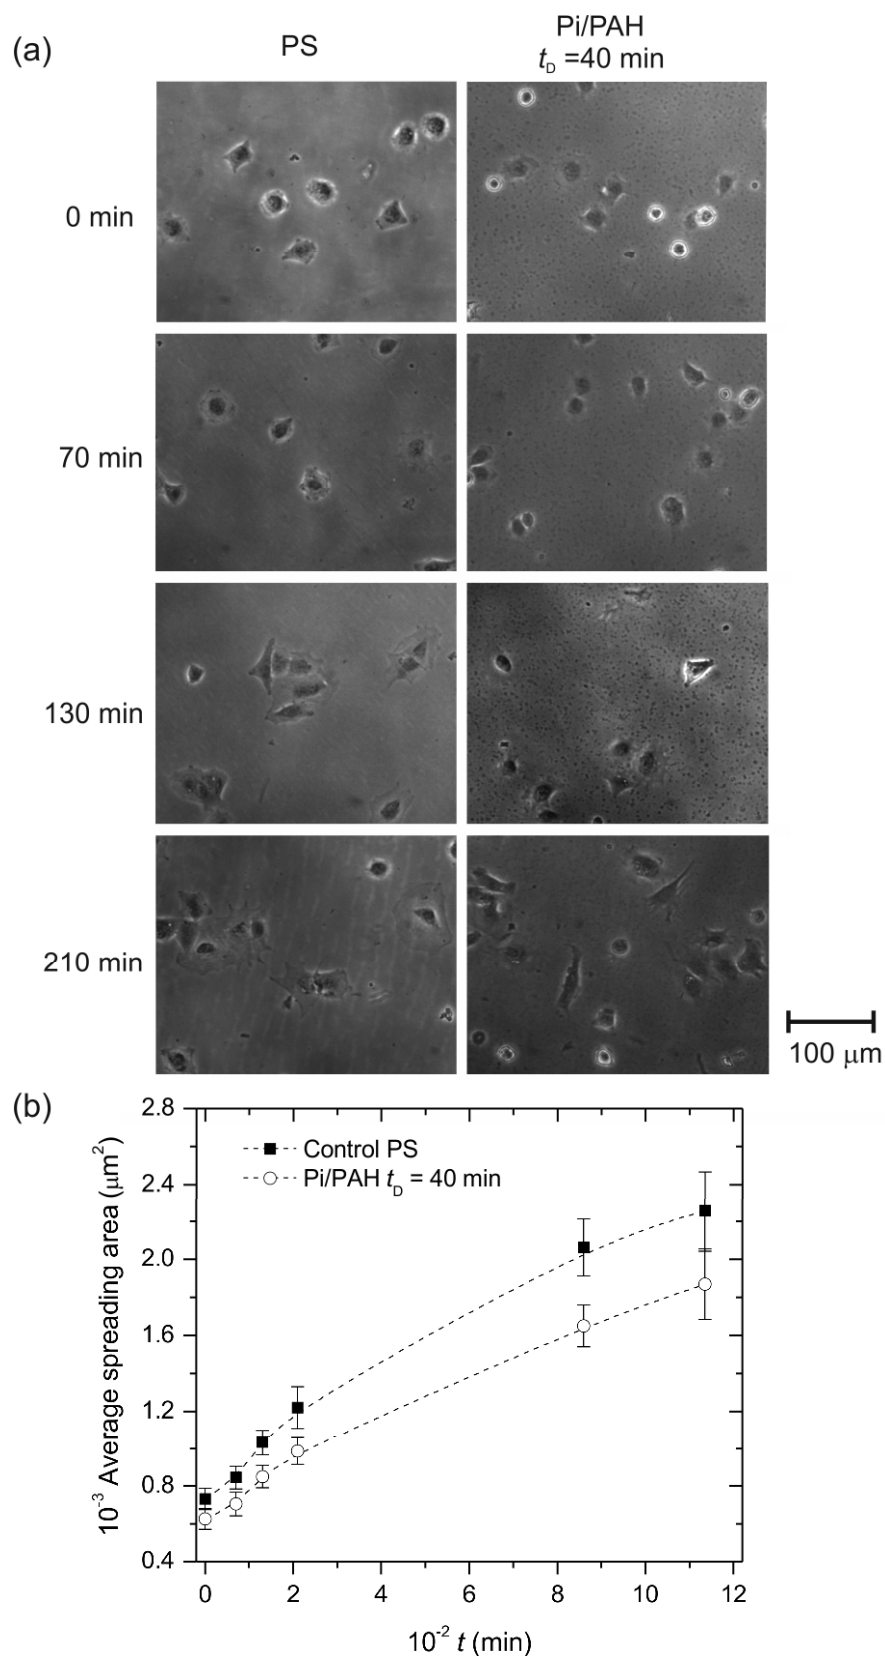

**Figure S2b.** Evolution of C2C12 cell spreading area at short culture times. The starting time was 2 h after seeding. (a) Phase contrast images taken at the times indicated in the figure. (b) Average cell spreading area versus culture time.

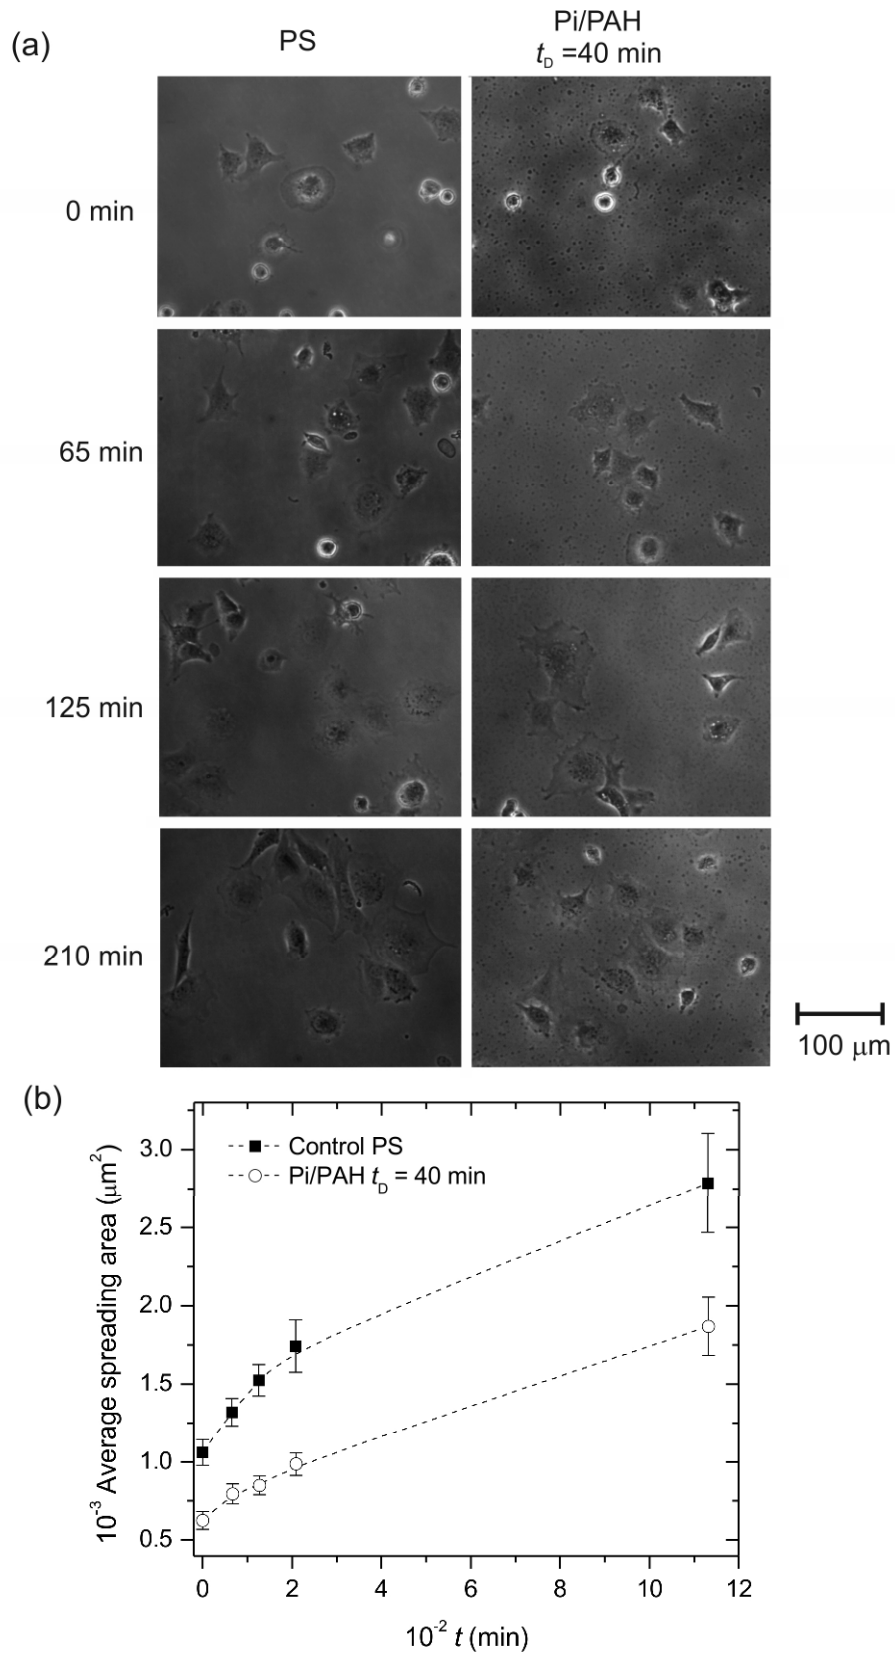

**Figure S2c.** Evolution of MC3T3 cell spreading area at short culture times. The starting time was 2 h after seeding. (a) Phase contrast images taken at the times indicated in the figure. (b) Average cell spreading area versus culture time.

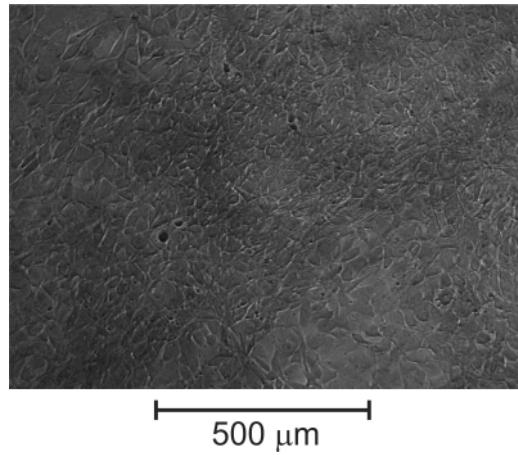

**Figure S3.** Phase contrast image of a MC3T3 culture grown for 20 days on Pi/PAH-coated substrate with  $t_D = 30$  min. Culture conditions: alpha-MEM supplemented with 10% FBS. A compact monolayer of cells is distinguished.

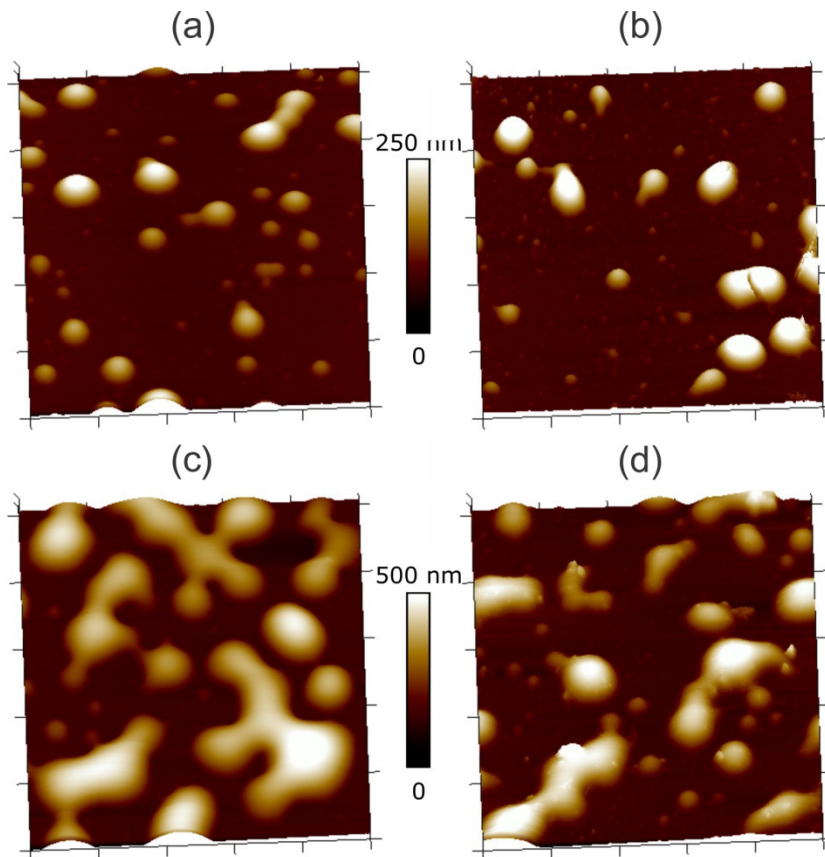

**Figure S4.** AFM peak force height images of freshly prepared and 4d-aged/4-day-aged Pi/PAH-coated substrates. Freshly prepared unannealed Pi/PAH-coated substrate with  $t_D = 40$  min (a) and  $t_D = 120$  min (c). Four-day-aged unannealed Pi/PAH-coated substrate with  $t_D = 40$  min (b) and  $t_D = 120$  min (d). All images are  $25 \times 25 \mu\text{m}^2$  in size.

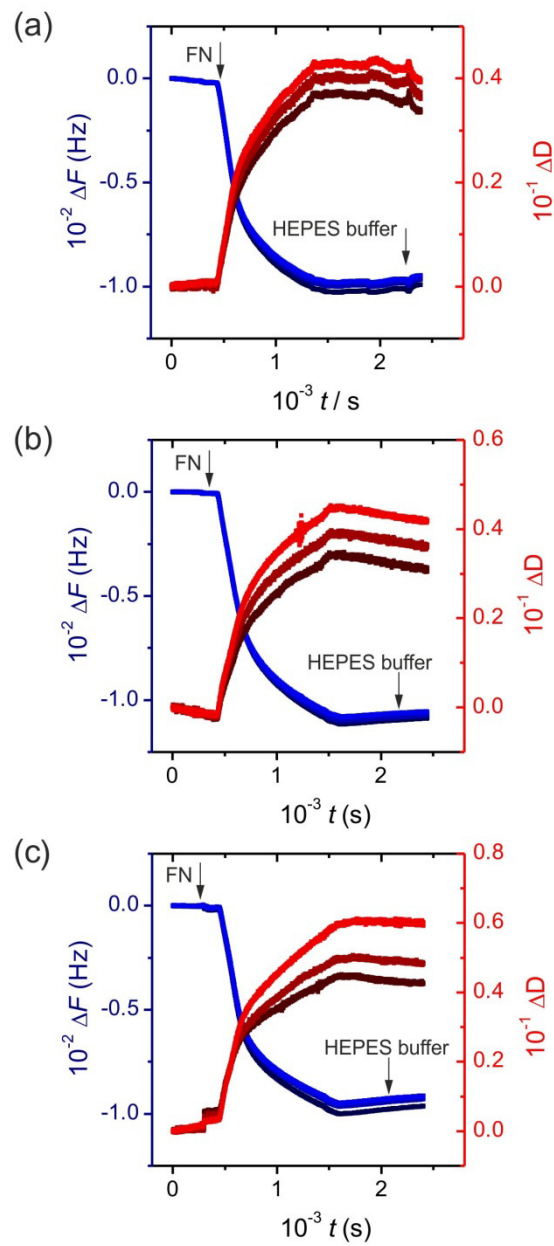

**Figure S5.** Frequency and dissipation changes as a function of the time for fibronectin adsorption from a  $20 \text{ mg mL}^{-1}$  solution in HEPES buffer, on (a) Pi/PAH-coated substrate with  $t_D = 40$  min, (b) Pi/PAH-coated substrate with  $t_D = 120$  min, and (c) annealed Pi/PAH-coated substrate with  $t_D = 120$  min. Arrows indicates the time of insertion of each solution.
